# Supplementary material for: Phospholipase C gamma 1 (PLCG1) R707Q mutation is counterselected under targeted therapy in a patient with hepatic angiosarcoma
Source: PubMed Central journal article supplement (PMC4742186; doi:10.18632/oncotarget.5503), 2015-10-10
Supplement: oncotarget-06-36418-s001.pdf [file oncotarget-06-36418-s001.pdf]

## SUPPLEMENTARY TABLES

**Supplementary Table S1: Copy number alterations (CNAs) detected using low-read-depth whole-genome sequencing.** Chromosomal segments and their copynumber (CN) are given for the primary and metastatic tumor lesions. CNAs were classified in 5 categories based on their copy number (CN); i.e., high-level deletions ( $CN < 1.5$ ) and amplifications ( $CN > 4.5$ ), low-level deletions ( $1.5 < CN < 2.5$ ) and amplifications ( $3.5 < CN < 4.5$ ) and copy-neutral regions ( $2.5 < CN < 3.5$ ). Interesting regions were defined as regions with high-level amplification or deletions or regions with a difference in copy number between primary and metastasis of more than 1.5. For each of these 19 regions the cancer consensus genes are given.

**Supplementary Table S2: Validation of genomic copy number changes of primary and metastatic tumor cells by FISH**

| FISH nr. | Tumor specimen | Gene (chromosome location)/<br>Centromer probe | Copy number<br>range | % of<br>abnormal | Interpretation            |
|----------|----------------|------------------------------------------------|----------------------|------------------|---------------------------|
| 1        | Primary        | <i>PDGFRA+KIT</i> (4q12)-SO/CEP4-SG            | 3-7/2-3              | 33%              | 4q12 amplification        |
|          | Metastatic     |                                                | 3-8/2                | 81%              | 4q12 amplification        |
| 2        | Primary        | <i>EGFR</i> (7p12)-SO/CEP7-SG                  | 3-4/3-4              | 19%              | <i>EGFR</i> /CEP7 gain    |
|          | Metastatic     |                                                | 3-4/3-4              | 70%              | <i>EGFR</i> /CEP7 gain    |
| 3        | Primary        | <i>MYC</i> (8q24)-SO/CEP8-SG                   | 1-2/2-3              | 18%              | <i>MYC</i> loss/CEP8 gain |
|          | Metastatic     |                                                | 3-4/3-4              | 59%              | <i>MYC</i> /CEP8 gain     |
| 4        | Primary        | <i>CDKN2A</i> (9p21)-SO/CEP9-SG                | 0-1/2                | 18%              | <i>CDKN2A</i> loss        |
|          | Metastatic     |                                                | 0-1/2                | 68%              | <i>CDKN2A</i> loss        |
| 5        | Primary        | <i>PTEN</i> (10q23)-SO/CEP10-SG                | 2/2                  | 0%               | Diploid                   |
|          | Metastatic     |                                                | 2/2                  | 0%               | Diploid                   |

Abbreviations: CEP - centromeric enumeration probe, SO-SpectrumOrange, SG-SpectrumGreen

**Supplementary Table S3: Mutations detected by whole-exome sequencing and validated using ultra-deep targeted resequencing**

| hg 19 Genomic position    | Gene    | Type                 | Allele change | Amino Acid change | Allele frequency germ-line | Total reads germ-line | Allele frequency primary tumor | Total reads primary tumor | Allele frequency metastasis | Total reads metastasis |
|---------------------------|---------|----------------------|---------------|-------------------|----------------------------|-----------------------|--------------------------------|---------------------------|-----------------------------|------------------------|
| chr19:54080634:54080635   | ZNF331  | frameshift deletion  | 820_821del    | 274_274del        | 0%                         | 405                   | 11%                            | 202                       | 0%                          | 63                     |
| chr17:39974399:39974399   | FKBP10  | nonsynonymous SNV    | G450T         | W150C             | 0%                         | 8269                  | 8%                             | 8629                      | 20%                         | 10508                  |
| chr17:7578475:7578475     | TP53    | nonsynonymous SNV    | C59T          | P20L              | 0%                         | 2936                  | 16%                            | 802                       | 62%                         | 213                    |
| chr20:9417666:9417666     | PLCB4   | frameshift insertion | 2595_2596insC | V865fs            | 0%                         | 8104                  | 8%                             | 9014                      | 19%                         | 11021                  |
| chr19:21366268:21366268   | ZNF431  | nonsynonymous SNV    | A1162G        | T388A             | 0%                         | 310                   | 20%                            | 575                       | 56%                         | 205                    |
| chr7:87911981:87911981    | STEAP4  | nonsynonymous SNV    | G959T         | R320I             | 0%                         | 1969                  | 14%                            | 4071                      | 42%                         | 942                    |
| chrX:48972614:48972614    | GPX1    | nonsynonymous SNV    | A977C         | Q326P             | 0%                         | 5850                  | 9%                             | 2286                      | 29%                         | 1704                   |
| chrX:48682137:48682137    | HDAC6   | nonsynonymous SNV    | G3245C        | G1082A            | 0%                         | 10975                 | 7%                             | 10711                     | 18%                         | 10028                  |
| chr19:6312434:6312434     | ACER1   | nonsynonymous SNV    | G170A         | R57H              | 0%                         | 7596                  | 7%                             | 9473                      | 24%                         | 5594                   |
| chr19:49842627:49842627   | CD37    | nonsynonymous SNV    | T725G         | L242R             | 0%                         | 7352                  | 16%                            | 7627                      | 67%                         | 5532                   |
| chr16:70551548:70551548   | COG4    | nonsynonymous SNV    | G350A         | R117H             | 0%                         | 1727                  | 10%                            | 1615                      | 27%                         | 397                    |
| chr5:140563476:140563476  | PCDHB16 | nonsynonymous SNV    | G1342A        | A448T             | 0%                         | 8247                  | 11%                            | 7990                      | 33%                         | 5749                   |
| chr11:124310617:124310617 | OR8B8   | nonsynonymous SNV    | G365A         | R122H             | 0%                         | 11988                 | 16%                            | 11161                     | 47%                         | 12402                  |
| chr15:30010598:30010598   | TJP1    | stopgain SNV         | C3748T        | Q1250X            | 0%                         | 8725                  | 17%                            | 10054                     | 71%                         | 12970                  |
| chr17:73565207:73565207   | LLGL2   | nonsynonymous SNV    | C1471T        | R491C             | 0%                         | 6618                  | 8%                             | 6177                      | 26%                         | 7490                   |
| chr10:134942261:134942261 | GPR123  | nonsynonymous SNV    | G929A         | R310H             | 0%                         | 7707                  | 16%                            | 8142                      | 36%                         | 2436                   |
| chr10:133930830:133930830 | JAKMIP3 | nonsynonymous SNV    | G385A         | E129K             | 0%                         | 9651                  | 8%                             | 9534                      | 11%                         | 11002                  |
| chr16:24828160:24828160   | TNRC6A  | nonsynonymous SNV    | A4855G        | K1619E            | 0%                         | 12184                 | 8%                             | 10990                     | 27%                         | 14122                  |
| chr3:131418773:131418773  | CPNE4   | nonsynonymous SNV    | G412T         | A138S             | 0%                         | 7494                  | 9%                             | 7614                      | 22%                         | 1764                   |
| chr9:117379485:117379485  | C9orf91 | nonsynonymous SNV    | G10A          | E4K               | 0%                         | 6800                  | 7%                             | 8397                      | 23%                         | 8924                   |
| chr5:36049073:36049073    | UGT3A2  | nonsynonymous SNV    | C659A         | A220D             | 0%                         | 6937                  | 0%                             | 8342                      | 15%                         | 8272                   |
| chr20:39795235:39795235   | PLCG1   | nonsynonymous SNV    | G2120A        | R707Q             | 0%                         | 6465                  | 0%                             | 7460                      | 17%                         | 6098                   |
| chr1:158436238:158436238  | OR10K1  | nonsynonymous SNV    | A887G         | E296G             | 0%                         | 759                   | 0%                             | 2802                      | 60%                         | 370                    |

(Continued)

| hg 19 Genomic position   | Gene   | Type                 | Allele change | Amino Acid change | Allele frequency germ-line | Total reads germ-line | Allele frequency primary tumor | Total reads primary tumor | Allele frequency metastasis | Total reads metastasis |
|--------------------------|--------|----------------------|---------------|-------------------|----------------------------|-----------------------|--------------------------------|---------------------------|-----------------------------|------------------------|
| chr6:70993492:70993492   | COL9A1 | nonsynonymous SNV    | A728T         | D243V             | 0%                         | 2226                  | 0%                             | 1481                      | 37%                         | 350                    |
| chrX:151869849:151869849 | MAGEA6 | nonsynonymous SNV    | C539A         | T180N             | 0%                         | 7530                  | 0%                             | 7859                      | 26%                         | 8555                   |
| chr8:87917418:87917418   | CNBD1  | frameshift insertion | 268_269insA   | Q90fs             | 0%                         | 4995                  | 0%                             | 7720                      | 11%                         | 4703                   |
| chr19:35622364:35622364  | LGI4   | nonsynonymous SNV    | G554A         | C185Y             | 0%                         | 10983                 | 0%                             | 9981                      | 25%                         | 10911                  |

For each of the mutations the genomic position, gene, type of mutation and change of nucleic or amino acid are given as well as the total number of reads and allelic frequencies in the germ-line, primary and metastasis sample
